# Supplementary material for: A novel method for cross-species gene expression analysis
Source: PubMed Central journal article supplement (PMC3679856; doi:10.1186/1471-2105-14-70), 2013-02-27

### A1: Two paralogs, same direction

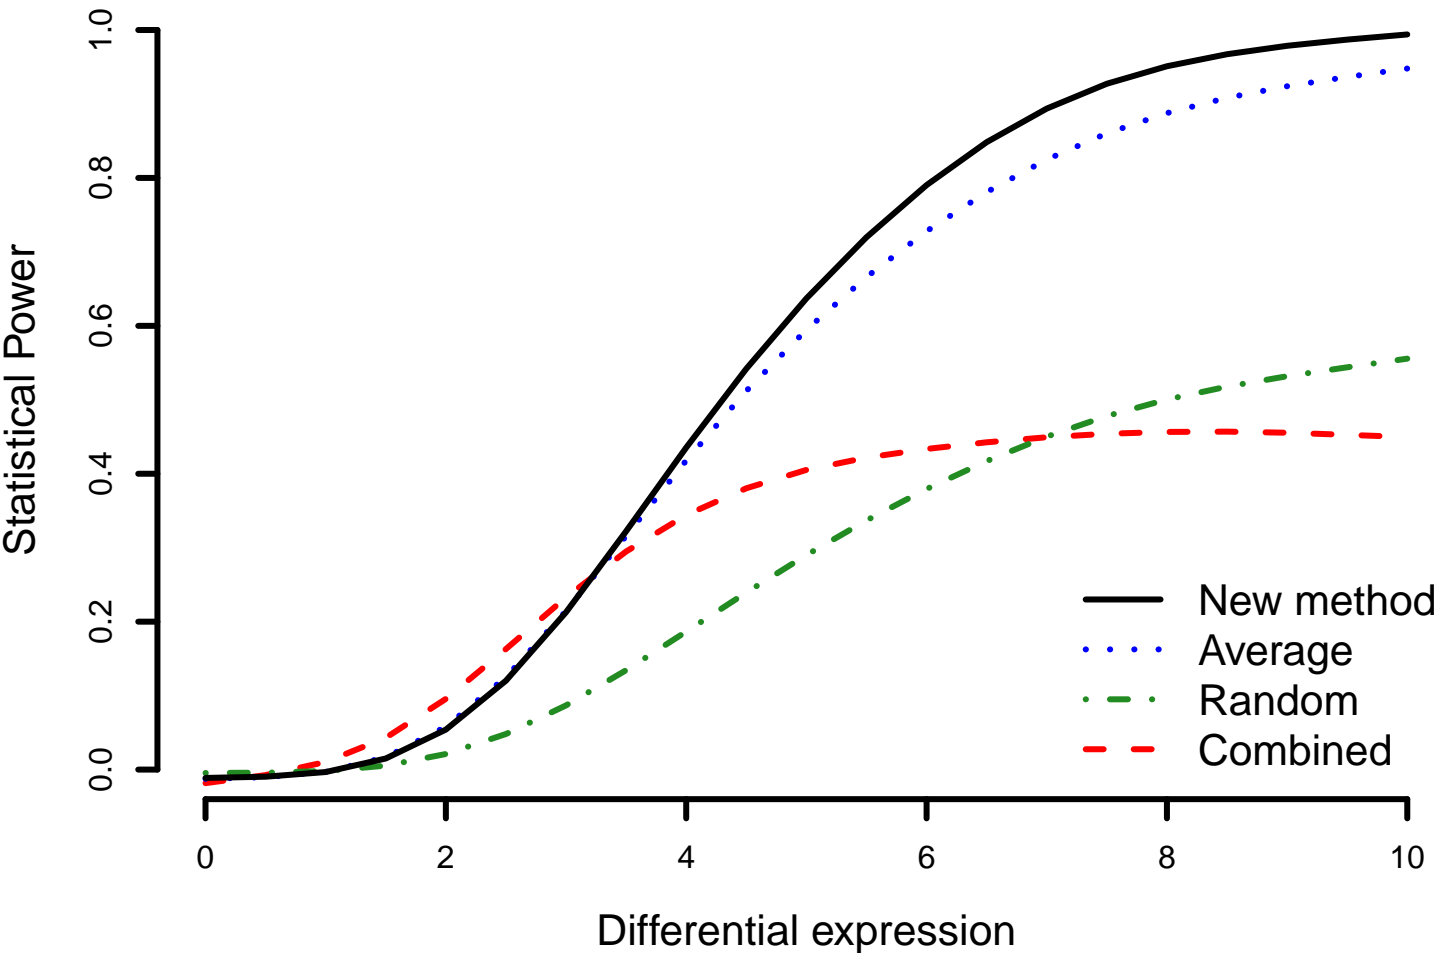

## A2: Two paralogs, one at the opposite direction

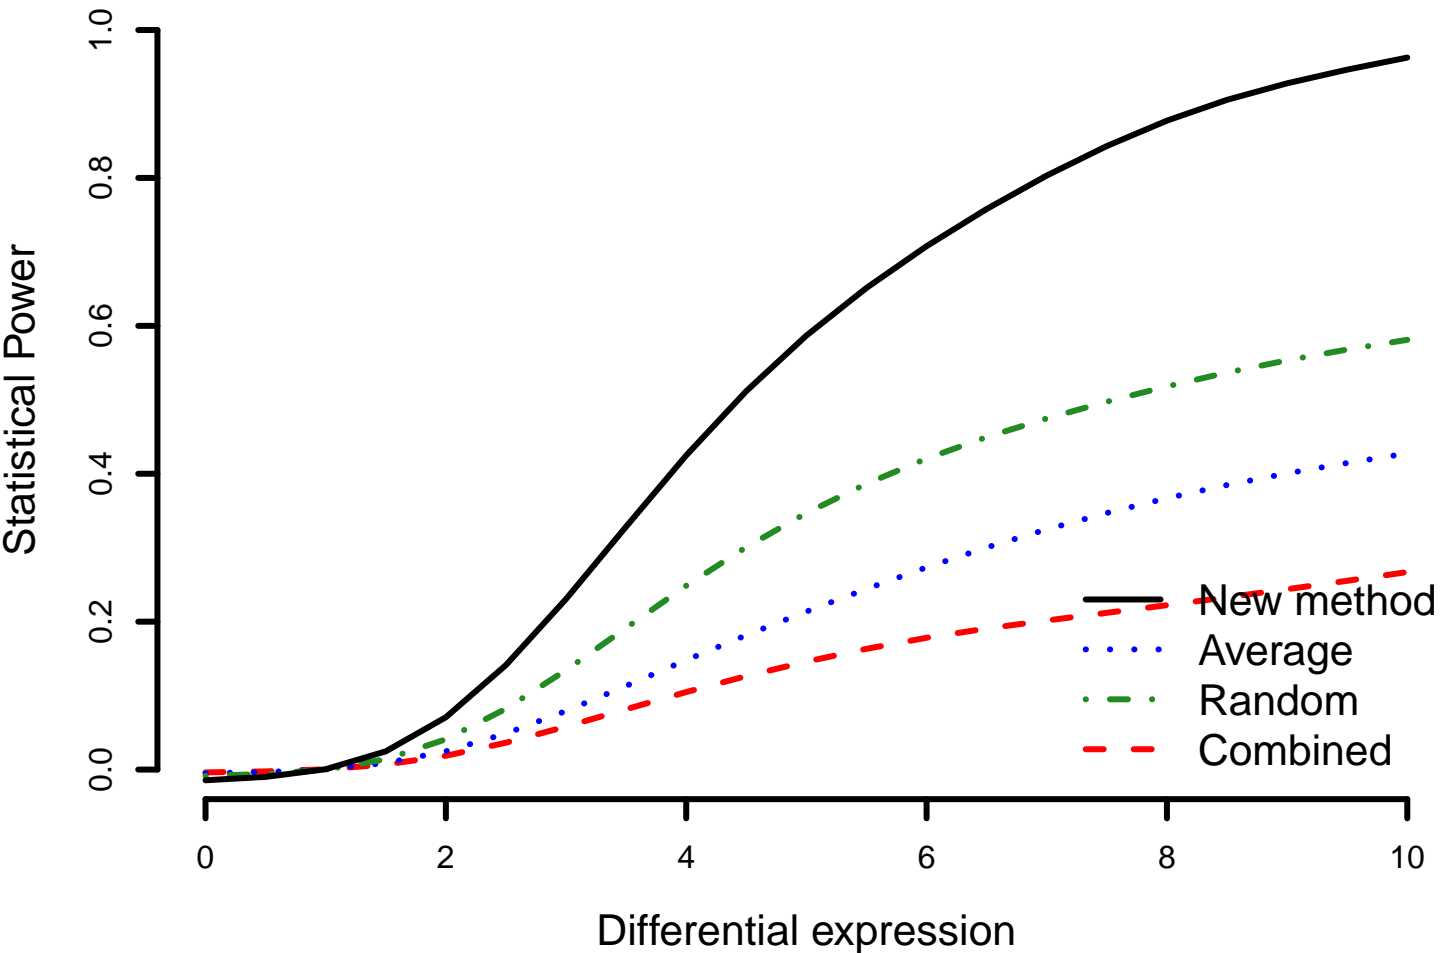

### A3: Thicker tails, t-distribution with df=5

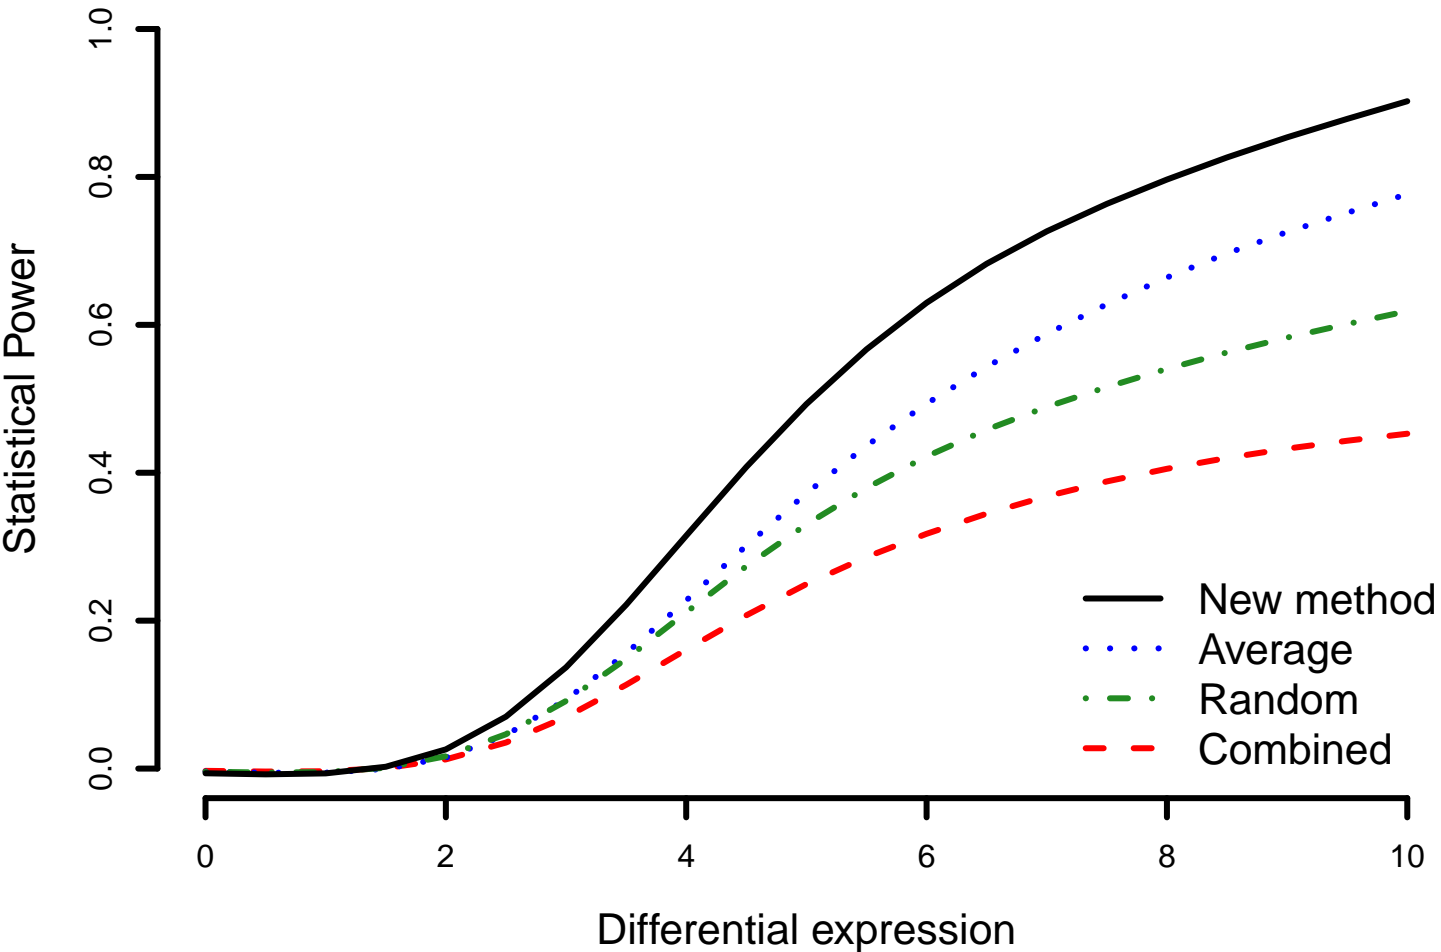

### A4: Errors in homology structure, $p=0.1$

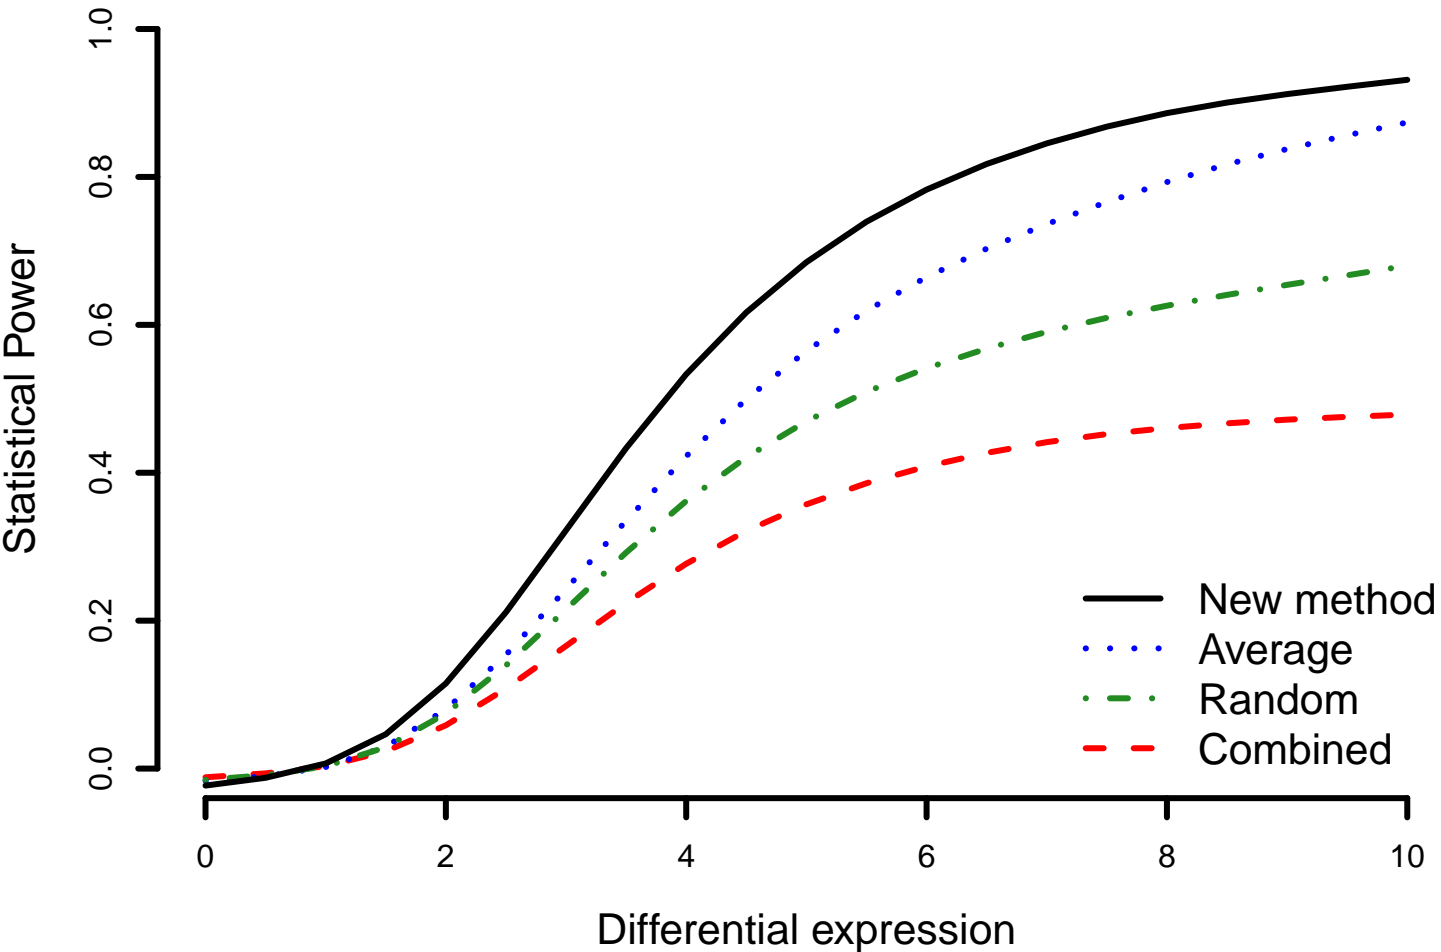

### A5: Errors in homology structure, $p=0.5$

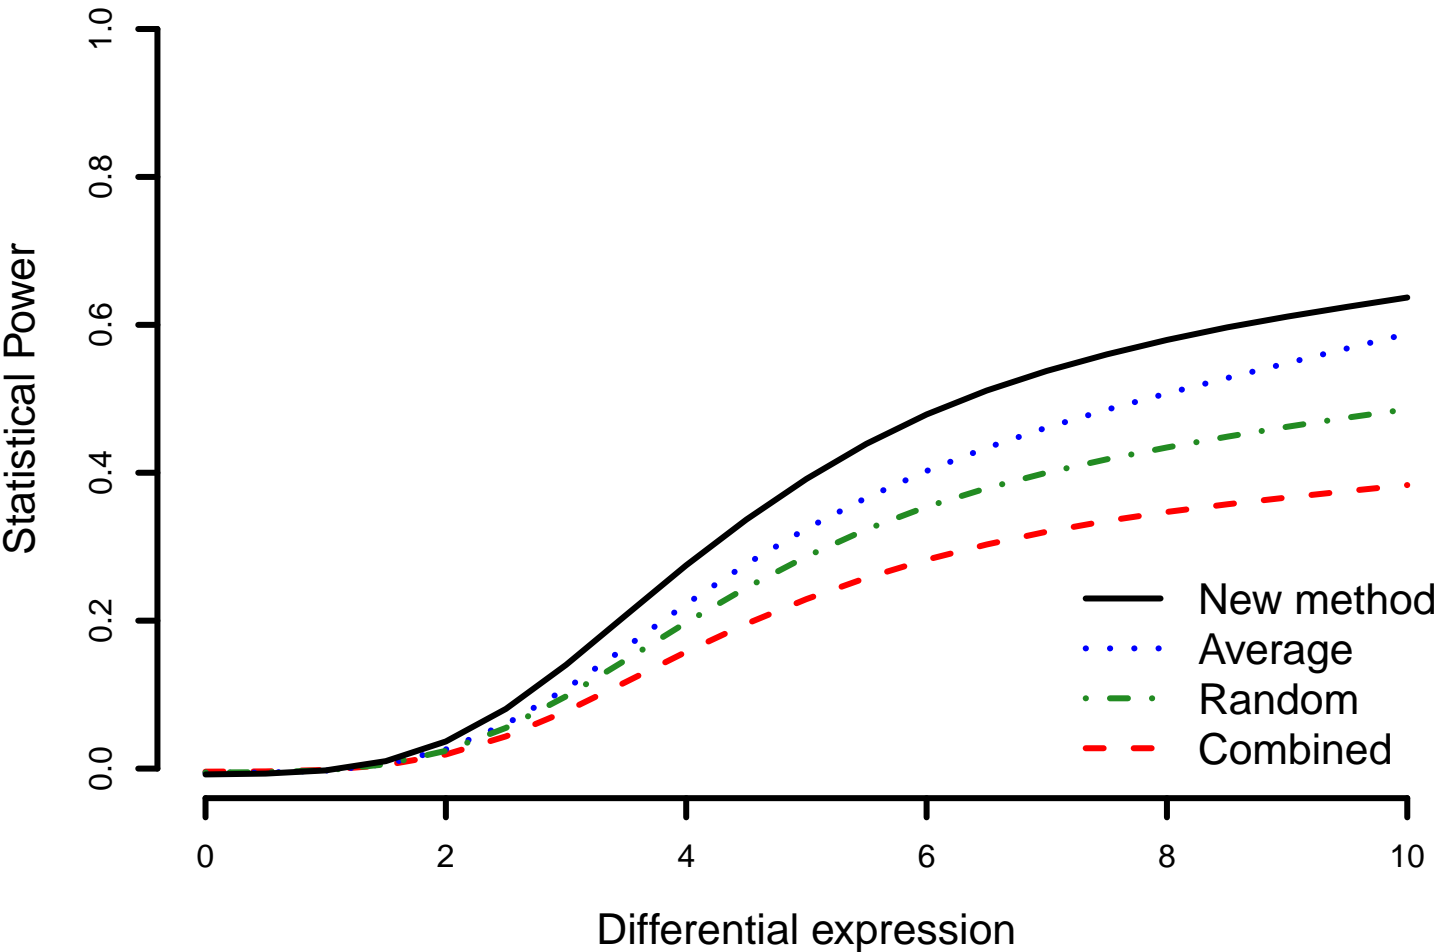

Supplement: 1471-2105-14-70-S1.pdf [file 1471-2105-14-70-S1.pdf]
